# Supplementary material
Source: MDPI journal article supplement (https://www.mdpi.com/2071-1050/15/10/8035)
Supplement: s1 [file s1]

## Supplementary Material

Table S1 show the hyper parameters tuned for each ML models, respectively. In the table, the first and second columns list the model and parameter names, while the third column illustrates the candidate values for grid search. The last column shows the optimal value for selected model. The models are obtained in R 4.1.2 with package caret 6.0, xgboost 1.5.0.2, e1071 1.7, nnet 7.3.

**Table S1.** Parameter setting

| Models        | parameter        | Candidate Parameter        | Selected Parameter |
|---------------|------------------|----------------------------|--------------------|
| Random Forest | ntrees           | 300, 400, 500, 600, 700    | 500                |
|               | nodesize         | 40, 50, 60, 70             | 60                 |
|               | mtry             | 1, 2, 3, 4, 5              | 3                  |
| XGBoost       | nrounds          | 30, 35, 40, 45, 50         | 45                 |
|               | max_depth        | 1, 2, 3                    | 1                  |
|               | eta              | 0.2 ,0.3, 0.4, 0.5, 0.6    | 0.4                |
|               | gamma            | 0.1, 0.15, 0.2, 0.25, 0.3  | 0.2                |
|               | colsample_bytree | 0.3, 0.5, 0.7, 1           | 0.5                |
|               | min_child_weight | 0.5, 1, 3, 5               | 1                  |
|               | subsample        | 0.3, 0.5, 0.7, 1           | 0.5                |
| SVM           | C                | 3, 5, 7, 9                 | 7                  |
|               | sigma            | 0.005, 0.01, 0.015, 0.02   | 0.01               |
| KNN           | K                | 2, 3, 4, 5, 6, 7, 8        | 5                  |
| ANN           | size             | 1, 2, 3, 4, 5              | 2                  |
|               | decay            | 0.05, 0.1, 0.15, 0.2, 0.25 | 0.1                |
